# Supplementary material
Source: PubMed Central journal article supplement (PMC10397364)
Supplement: NIHMS1855827-supplement-1.pdf [file NIHMS1855827-supplement-1.pdf]

**Table S1***Independent Associations among ACEs, BCEs, Recent NLEs, Demographic Covariates, and Latent HiTOP Dimensions*

| <b>Construct</b>           | <b>ACEs</b>     | <b>NLEs</b>    | <b>Age</b>    | <b>Education</b> | <b>Income</b> |
|----------------------------|-----------------|----------------|---------------|------------------|---------------|
| p                          | 0.29 (0.06)***  | 0.03 (0.06)    | 0.19 (0.07)** | -0.35 (0.08)***  | -0.10 (0.08)  |
| Thought Problems           | 0.33 (0.08)***  | 0.05 (0.08)    | 0.09 (0.09)   | -0.22 (0.10)*    | -0.08 (0.10)  |
| Internalizing Symptoms     | 0.21 (0.06)**   | 0.04 (0.06)    | 0.20 (0.07)** | -0.31 (0.08)***  | -0.08 (0.08)  |
| Detachment                 | 0.23 (0.06)***  | -0.04 (0.06)   | 0.21 (0.07)** | -0.35 (0.09)***  | -0.08 (0.08)  |
| Disinhibited Externalizing | 0.32 (0.08)***  | 0.11 (0.08)    | 0.12 (0.09)   | -0.21 (0.11)*    | -0.14 (0.09)  |
| Antagonistic Externalizing | 0.34 (0.06)***  | 0.05 (0.06)    | -0.01 (0.07)  | -0.26 (0.09)**   | -0.12 (0.08)  |
| Fear                       | -0.06 (0.05)    | 0.03 (0.05)    | 0.02 (0.07)   | 0.01 (0.07)      | 0.04 (0.06)   |
| Distress                   | -0.02 (0.04)    | 0.05 (0.04)    | 0.08 (0.05)   | -0.05 (0.06)     | -0.01 (0.05)  |
| Substance Use              | 0.04 (0.05)     | 0.05 (0.05)    | 0.00 (0.06)   | -0.11 (0.08)     | 0.02 (0.06)   |
| Antisocial Behavior        | 0.12 (0.05)*    | 0.08 (0.05)    | 0.00 (0.06)   | 0.00 (0.07)      | -0.07 (0.06)  |
| <b>Construct</b>           | <b>ACEs</b>     | <b>BCEs</b>    | <b>Age</b>    | <b>Education</b> | <b>Income</b> |
| p                          | 0.26 (0.07)***  | -0.16 (0.07)*  | 0.23 (0.08)** | -0.39 (0.09)***  | -0.01 (0.09)  |
| Thought Problems           | 0.31 (0.09)**   | -0.19 (0.09)*  | 0.14 (0.10)   | -0.23 (0.12)     | -0.02 (0.12)  |
| Internalizing Symptoms     | 0.18 (0.08)*    | -0.12 (0.07)   | 0.23 (0.08)** | -0.34 (0.10)***  | 0.01 (0.10)   |
| Detachment                 | 0.19 (0.07)**   | -0.15 (0.07)*  | 0.24 (0.08)** | -0.45 (0.09)***  | 0.04 (0.09)   |
| Disinhibited Externalizing | 0.26 (0.09)**   | -0.24 (0.09)** | 0.12 (0.09)   | -0.13 (0.12)     | -0.17 (0.11)  |
| Antagonistic Externalizing | 0.35 (0.07)***  | -0.02 (0.07)   | 0.03 (0.08)   | -0.19 (0.10)     | -0.11 (0.10)  |
| Fear                       | -0.09 (0.06)    | -0.03 (0.05)   | 0.03 (0.06)   | 0.02 (0.08)      | 0.04 (0.07)   |
| Distress                   | -0.01 (0.05)    | 0.01 (0.05)    | 0.07 (0.05)   | -0.03 (0.07)     | 0.00 (0.06)   |
| Substance Use              | -0.00 (0.04)    | -0.03 (0.04)   | 0.01 (0.04)   | -0.03 (0.05)     | -0.02 (0.05)  |
| Antisocial Behavior        | 0.10 (0.07)     | -0.12 (0.06)   | -0.01 (0.07)  | 0.09 (0.09)      | -0.14 (0.08)  |
| <b>Construct</b>           | <b>BCEs</b>     | <b>NLEs</b>    | <b>Age</b>    | <b>Education</b> | <b>Income</b> |
| p                          | -0.23 (0.07)*** | 0.07 (0.07)    | 0.16 (0.08)*  | -0.38 (0.10)***  | -0.09 (0.09)  |
| Thought Problems           | -0.28 (0.08)*** | 0.10 (0.08)    | 0.10 (0.09)   | -0.24 (0.12)*    | -0.10 (0.11)  |
| Internalizing Symptoms     | -0.16 (0.07)*   | 0.06 (0.07)    | 0.18 (0.08)*  | -0.33 (0.10)**   | -0.05 (0.09)  |
| Detachment                 | -0.20 (0.07)**  | 0.03 (0.07)    | 0.18 (0.07)*  | -0.42 (0.09)***  | -0.03 (0.09)  |
| Disinhibited Externalizing | -0.32 (0.09)*** | 0.13 (0.08)    | 0.07 (0.09)   | -0.13 (0.13)     | -0.23 (0.11)* |
| Antagonistic Externalizing | -0.14 (0.07)    | 0.03 (0.08)    | -0.01 (0.09)  | -0.23 (0.10)*    | -0.17 (0.10)  |
| Fear                       | 0.02 (0.05)     | 0.00 (0.05)    | 0.06 (0.06)   | -0.01 (0.08)     | 0.07 (0.07)   |
| Distress                   | 0.02 (0.04)     | 0.03 (0.04)    | 0.06 (0.05)   | -0.04 (0.07)     | -0.01 (0.06)  |
| Substance Use              | -0.04 (0.04)    | 0.02 (0.03)    | -0.01 (0.03)  | -0.03 (0.05)     | -0.01 (0.04)  |
| Antisocial Behavior        | -0.12 (0.06)*   | 0.07 (0.05)    | -0.02 (0.06)  | 0.08 (0.08)      | -0.15 (0.07)* |

*Note.* ACEs = Adverse Childhood Experiences. NLEs = Negative Life Experiences. BCEs = Benevolent Childhood Experiences. p = General psychopathology higher-order factor. All estimates are standardized. Values in parentheses are standard errors of the estimates. \* $p < .05$ , \*\* $p < .01$ , \*\*\* $p < .001$ .

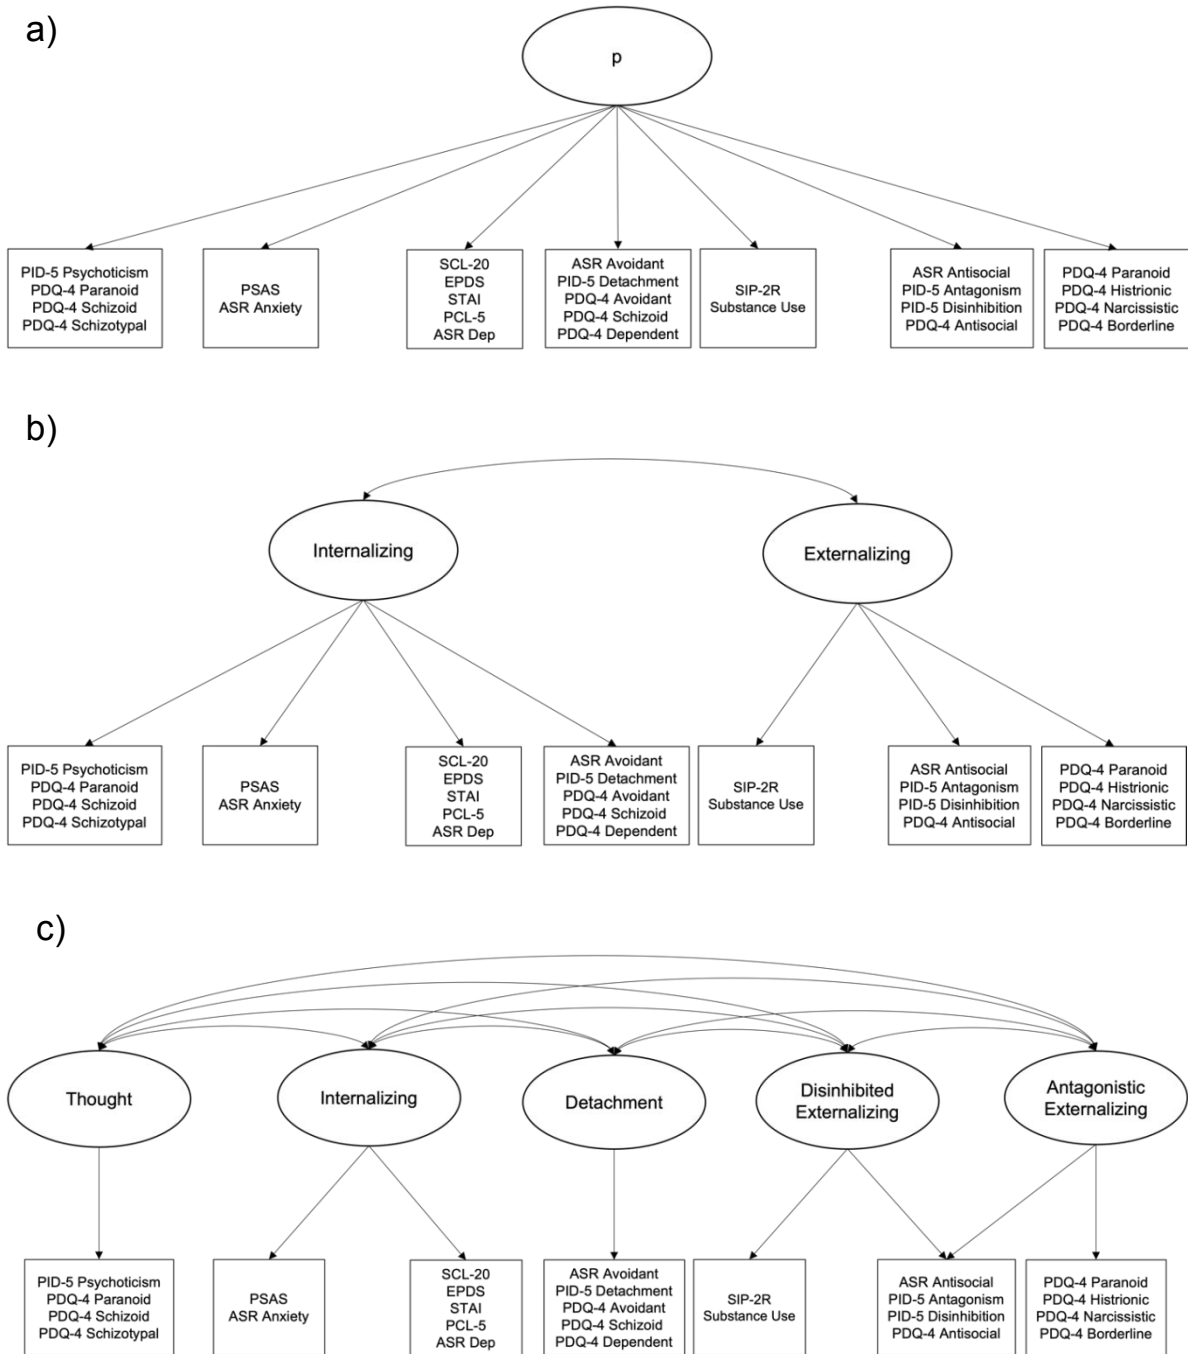

Figure S1. Unidimensional model of psychopathology (a); correlated two-factor model of psychopathology (b); correlated five-factor model of psychopathology (c).

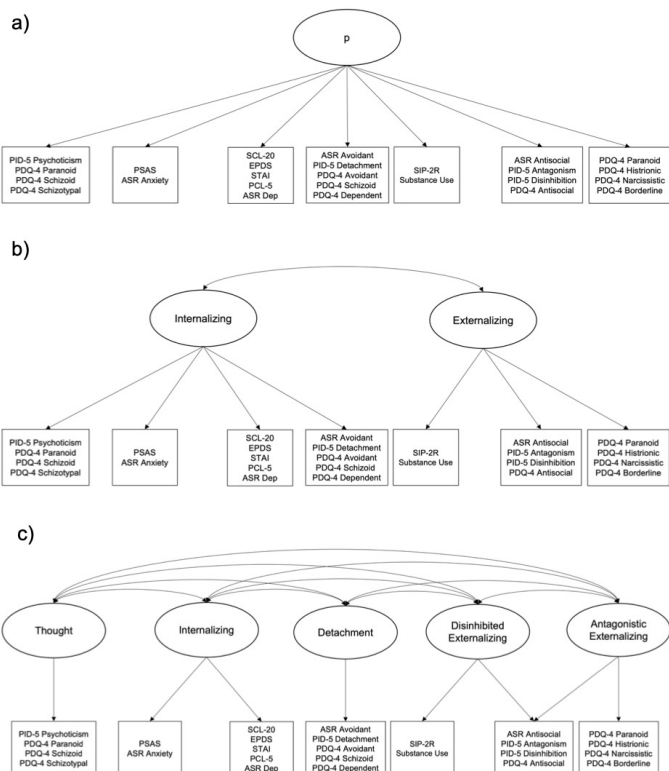

Figure S1. Unidimensional model of psychopathology (a); correlated two-factor model of psychopathology (b); correlated five-factor model of psychopathology (c).

449x582mm (72 x 72 DPI)
